# Supplementary material for: Genetic association and meta-analysis of a schizophrenia GWAS variant rs10489202 in East Asian populations
Source: PubMed Central journal article supplement (PMC6081446; doi:10.1038/s41398-018-0211-x), 2018-08-07
Supplement: 41398_2018_211_MOESM1_ESM.pdf [file 41398_2018_211_MOESM1_ESM.pdf]

**Table S1. Genome-wide significant SNPs in the GWASs reported by Yue et al.<sup>1</sup> and Shi et al.<sup>2</sup>**

| CHR | SNP        | Allele | Frequency | Case  | Control | P-value                | OR   | Ref. |
|-----|------------|--------|-----------|-------|---------|------------------------|------|------|
| 6   | rs1233710  | T/C    | 0.350     | 4,773 | 7,207   | 4.76×10 <sup>-11</sup> | 0.79 | 1    |
| 6   | rs1635     | A/C    | 0.350     | 4,773 | 7,207   | 6.91×10 <sup>-12</sup> | 0.78 | 1    |
| 6   | rs2142731  | G/A    | 0.242     | 4,773 | 7,207   | 5.14×10 <sup>-10</sup> | 0.79 | 1    |
| 11  | rs11038167 | A/C    | 0.375     | 4,773 | 7,207   | 1.09×10 <sup>-11</sup> | 1.29 | 1    |
| 11  | rs11038172 | A/G    | 0.399     | 4,773 | 7,207   | 7.21×10 <sup>-10</sup> | 1.25 | 1    |
| 11  | rs835784   | A/G    | 0.249     | 4,773 | 7,207   | 2.73×10 <sup>-11</sup> | 1.27 | 1    |
| 1   | rs10489202 | T/G    | 0.131     | 8,133 | 11,007  | 9.50×10 <sup>-09</sup> | 1.23 | 2    |
| 8   | rs16887244 | G/A    | 0.326     | 8,133 | 11,007  | 1.27×10 <sup>-10</sup> | 0.84 | 2    |
| 8   | rs1488935  | A/G    | 0.320     | 8,133 | 11,007  | 5.06×10 <sup>-09</sup> | 0.85 | 2    |

The frequency is based on the first allele.

**Abbreviation:**

CHR, chromosome; SNP, single nucleotide polymorphism; OR, odds ratio; Ref., references.

**Table S2. Genome-wide significant SNPs in the GWASs reported by Li et al.<sup>3</sup> and Yu et al.<sup>4</sup>**

| CHR | SNP         | Allele | Frequency | Case   | Control | P-value                | OR    | Ref. |
|-----|-------------|--------|-----------|--------|---------|------------------------|-------|------|
| 2   | rs1518395   | A/G    | 0.308     | 12,083 | 24,097  | 3.78×10 <sup>-13</sup> | 0.862 | 3    |
| 2   | rs78681500  | T/C    | 0.063     | 12,083 | 24,097  | 3.08×10 <sup>-10</sup> | 0.751 | 3    |
| 3   | rs2073499   | A/G    | 0.312     | 12,083 | 24,097  | 2.61×10 <sup>-08</sup> | 0.899 | 3    |
| 6   | rs111782145 | C/T    | 0.037     | 12,083 | 24,097  | 1.80×10 <sup>-08</sup> | 0.813 | 3    |
| 6   | rs7757969   | C/T    | 0.269     | 12,083 | 24,097  | 4.82×10 <sup>-08</sup> | 1.110 | 3    |
| 6   | rs4479915   | G/C    | 0.254     | 12,083 | 24,097  | 4.82×10 <sup>-09</sup> | 0.876 | 3    |
| 7   | rs11534004  | G/A    | 0.334     | 12,083 | 24,097  | 1.71×10 <sup>-08</sup> | 0.890 | 3    |
| 2   | rs1051061   | G/A    | 0.412     | 8,723  | 12,813  | 1.14×10 <sup>-10</sup> | 1.17  | 4    |
| 6   | rs115070292 | G/A    | 0.136     | 8,723  | 12,813  | 4.96×10 <sup>-10</sup> | 0.77  | 4    |
| 10  | rs10883795  | C/T    | 0.496     | 8,723  | 12,813  | 7.94×10 <sup>-10</sup> | 0.87  | 4    |
| 10  | rs10883765  | C/T    | 0.449     | 8,723  | 12,813  | 3.06×10 <sup>-09</sup> | 0.87  | 4    |

The frequency is based on the first allele.

**Abbreviation:**

CHR, chromosome; SNP, single nucleotide polymorphism; OR, odds ratio; Ref., references.

**Table S3. "Leave-one-out" sensitivity analysis for meta-analysis**

| Excluded study | Remaining sample size |         | Heterogeneity         | Random effect model |             |                        | Fixed effect model |             |                        |
|----------------|-----------------------|---------|-----------------------|---------------------|-------------|------------------------|--------------------|-------------|------------------------|
|                | Case                  | Control |                       | OR                  | 95%CIs      | Meta P value           | OR                 | 95%CIs      | Meta P value           |
| Shi, 2011a     | 10,590                | 13,881  | $p=0.250, I^2=21.7\%$ | 1.124               | 1.053-1.198 | $4.00 \times 10^{-4}$  | 1.132              | 1.074-1.194 | $4.03 \times 10^{-6}$  |
| Shi, 2011b     | 9,957                 | 15,810  | $p=0.092, I^2=41.4\%$ | 1.133               | 1.048-1.226 | $1.81 \times 10^{-3}$  | 1.148              | 1.086-1.215 | $1.37 \times 10^{-6}$  |
| Ma, 2012       | 13,364                | 19,306  | $p=0.089, I^2=41.7\%$ | 1.149               | 1.071-1.233 | $1.13 \times 10^{-4}$  | 1.165              | 1.111-1.223 | $4.97 \times 10^{-10}$ |
| Jin, 2013      | 13,247                | 19,327  | $p=0.743, I^2=0$      | 1.185               | 1.129-1.244 | $6.42 \times 10^{-12}$ | 1.185              | 1.129-1.244 | $6.42 \times 10^{-12}$ |
| Wong, 2013     | 13,842                | 18,324  | $p=0.089, I^2=41.7\%$ | 1.149               | 1.073-1.231 | $7.19 \times 10^{-5}$  | 1.164              | 1.110-1.221 | $3.39 \times 10^{-10}$ |
| Saito, 2014    | 13,308                | 19,356  | $p=0.093, I^2=41.1\%$ | 1.136               | 1.060-1.218 | $3.31 \times 10^{-4}$  | 1.156              | 1.102-1.213 | $3.64 \times 10^{-9}$  |
| Guan, 2015     | 12,869                | 18,821  | $p=0.111, I^2=38.6\%$ | 1.154               | 1.076-1.238 | $6.33 \times 10^{-5}$  | 1.171              | 1.115-1.230 | $3.39 \times 10^{-10}$ |
| Li, 2016a      | 14,040                | 20,049  | $p=0.085, I^2=42.4\%$ | 1.141               | 1.066-1.221 | $1.33 \times 10^{-4}$  | 1.159              | 1.106-1.215 | $7.75 \times 10^{-10}$ |
| Li, 2016b      | 13,940                | 19,949  | $p=0.081, I^2=43.0\%$ | 1.146               | 1.070-1.227 | $1.04 \times 10^{-4}$  | 1.162              | 1.108-1.218 | $4.66 \times 10^{-10}$ |
| Current        | 13,903                | 18,318  | $p=0.081, I^2=43.0\%$ | 1.140               | 1.062-1.223 | $2.83 \times 10^{-4}$  | 1.159              | 1.105-1.216 | $1.74 \times 10^{-9}$  |

**Table S4. Association of rs10489202 with nearby gene expression in the lymphoblastoid cell lines from 85 East Asian individuals<sup>5</sup>**

|        | <b>Beta estimate</b> | <b>Standard error</b> | <b>T-value</b> | <b>P-value</b> |
|--------|----------------------|-----------------------|----------------|----------------|
| CD247  | -0.00302             | 0.0361                | -0.0837        | 0.934          |
| CREG1  | -0.0306              | 0.0730                | -0.419         | 0.676          |
| RCS1   | 0.0232               | 0.0803                | 0.289          | 0.774          |
| MPZL1  | 0.00714              | 0.0541                | 0.132          | 0.895          |
| ADCY10 | 0.000448             | 0.0158                | 0.0283         | 0.977          |
| MPC2   | -0.0232              | 0.0671                | -0.346         | 0.730          |
| DCAF6  | 0.0505               | 0.0632                | 0.797          | 0.427          |
| GPR161 | -0.0278              | 0.0192                | -1.443         | 0.153          |
| TIPRL  | -0.313               | 0.0868                | -3.605         | 0.000567       |
| SFT2D2 | -0.00534             | 0.0264                | -0.202         | 0.840          |
| TBX19  | 0.0486               | 0.0278                | 1.747          | 0.0848         |

## References

1. Yue WH, Wang HF, Sun LD, Tang FL, Liu ZH, Zhang HX *et al.* Genome-wide association study identifies a susceptibility locus for schizophrenia in Han Chinese at 11p11.2. *Nat Genet* 2011; **43**(12): 1228-31.
2. Shi Y, Li Z, Xu Q, Wang T, Li T, Shen J *et al.* Common variants on 8p12 and 1q24.2 confer risk of schizophrenia. *Nat Genet* 2011; **43**(12): 1224-7.
3. Li Z, Chen J, Yu H, He L, Xu Y, Zhang D *et al.* Genome-wide association analysis identifies 30 new susceptibility loci for schizophrenia. *Nat Genet* 2017; **49**(11): 1576-83.
4. Yu H, Yan H, Li J, Li Z, Zhang X, Ma Y *et al.* Common variants on 2p16.1, 6p22.1 and 10q24.32 are associated with schizophrenia in Han Chinese population. *Mol Psychiatry* 2017; **22**(7): 954-60.
5. Stranger BE, Montgomery SB, Dimas AS, Parts L, Stegle O, Ingle CE *et al.* Patterns of cis regulatory variation in diverse human populations. *PLoS Genet* 2012; **8**(4): e1002639.









| Table S5. Functional prediction analysis of the SNPs in high LD with rs10489202 ( $r^2 > 0.8$ ) using the GWAVA dataset ( <a href="http://www.sanger.ac.uk/sanger/StatGen_Gwava">http://www.sanger.ac.uk/sanger/StatGen_Gwava</a> ) |        |            |            |           |           |           |           |          |          |            |           |            |           |           |            |            |            |            |            |            |           |
|-------------------------------------------------------------------------------------------------------------------------------------------------------------------------------------------------------------------------------------|--------|------------|------------|-----------|-----------|-----------|-----------|----------|----------|------------|-----------|------------|-----------|-----------|------------|------------|------------|------------|------------|------------|-----------|
| #                                                                                                                                                                                                                                   | 1      | 2          | 3          | 4         | 5         | 6         | 7         | 8        | 9        | 10         | 11        | 12         | 13        | 14        | 15         | 16         | 17         | 18         | 19         | 20         | 21        |
| ID                                                                                                                                                                                                                                  | rs2420 | rs17556487 | rs10489202 | rs1846416 | rs4656564 | rs7535138 | rs2272911 | rs718885 | rs149912 | rs12404574 | rs4657727 | rs12727036 | rs1060041 | rs7538581 | rs12408205 | rs17557135 | rs17557162 | rs11587594 | rs66950781 | rs17485889 | rs4657730 |
| ZEB1                                                                                                                                                                                                                                | -      | -          | -          | 1         | -         | -         | -         | -        | -        | -          | -         | -          | -         | -         | -          | -          | -          | -          | -          | -          | -         |
| ZNF143                                                                                                                                                                                                                              | -      | -          | -          | -         | -         | -         | -         | -        | -        | -          | -         | -          | -         | -         | -          | -          | -          | -          | -          | -          | -         |
| ZNF263                                                                                                                                                                                                                              | -      | -          | -          | -         | -         | -         | -         | -        | -        | -          | -         | -          | -         | -         | -          | -          | -          | -          | -          | -          | -         |
| ZNF274                                                                                                                                                                                                                              | -      | -          | -          | -         | -         | -         | -         | -        | -        | -          | -         | -          | -         | -         | -          | -          | -          | -          | -          | -          | -         |
| ZZZ3                                                                                                                                                                                                                                | -      | -          | -          | -         | -         | -         | -         | -        | -        | -          | -         | -          | -         | -         | -          | -          | -          | -          | -          | -          | -         |
| bound_motifs                                                                                                                                                                                                                        | -      | -          | -          | 3         | -         | -         | -         | -        | -        | -          | -         | -          | -         | -         | -          | -          | -          | -          | -          | -          | -         |
| cpg_island                                                                                                                                                                                                                          | -      | -          | -          | 1         | -         | -         | -         | -        | -        | -          | -         | -          | -         | -         | -          | -          | -          | -          | -          | -          | -         |
| dnase_fps                                                                                                                                                                                                                           | 1      | -          | -          | 29        | -         | -         | -         | 1        | -        | -          | -         | -          | -         | -         | -          | -          | -          | -          | -          | -          | -         |
| in_cpg                                                                                                                                                                                                                              | -      | -          | -          | -         | -         | -         | -         | -        | -        | -          | -         | -          | -         | -         | -          | -          | -          | -          | -          | -          | -         |
| pwm                                                                                                                                                                                                                                 | -      | -          | -          | -         | -         | -         | -         | -        | -        | -          | -         | -          | -         | -         | -          | -          | -          | -          | -          | -          | -         |
| repeat                                                                                                                                                                                                                              | 1      | -          | -          | -         | 1         | 1         | -         | 1        | -        | -          | 1         | 1          | -         | -         | -          | -          | -          | -          | 1          | -          | -         |
| seq_A                                                                                                                                                                                                                               | 1      | -          | -          | -         | -         | -         | -         | 1        | 1        | 1          | -         | 1          | -         | 1         | 1          | 1          | -          | 1          | -          | -          | 1         |
| seq_C                                                                                                                                                                                                                               | -      | -          | -          | -         | -         | -         | 1         | -        | -        | -          | -         | -          | 1         | -         | -          | -          | -          | -          | 1          | -          | -         |
| seq_G                                                                                                                                                                                                                               | -      | -          | 1          | 1         | -         | -         | -         | -        | -        | -          | -         | -          | -         | -         | -          | -          | -          | -          | -          | 1          | -         |
| seq_T                                                                                                                                                                                                                               | -      | 1          | -          | -         | 1         | 1         | -         | -        | -        | -          | 1         | -          | -         | -         | -          | -          | 1          | -          | -          | -          | -         |
