# Supplementary material for: Genetic association and meta-analysis of a schizophrenia GWAS variant rs10489202 in East Asian populations
Source: Transl Psychiatry. 2018 Aug 7;8:144. doi: 10.1038/s41398-018-0211-x (PMC6081446; doi:10.1038/s41398-018-0211-x)

**Figure S1. Haplotype block structure of the common SNPs in MPC2 in East Asian populations.** The LD value was shown as  $r^2$ . The SNPs tested in this study were highlighted with a blue rectangle.

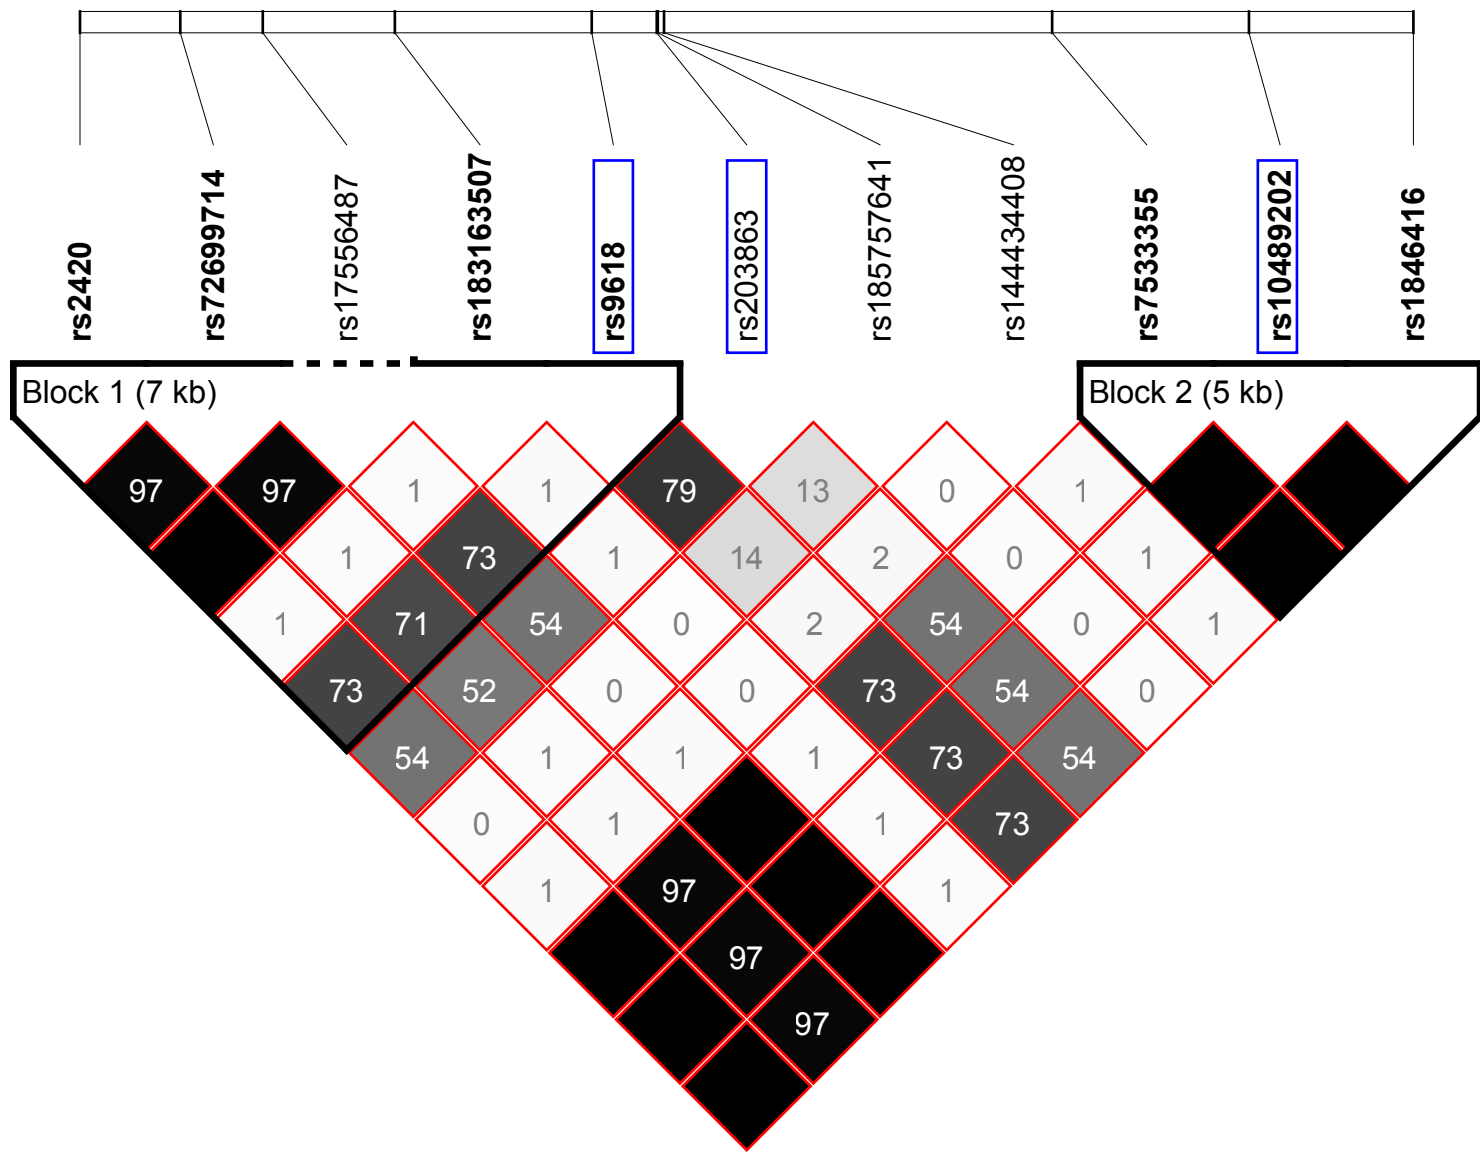

**Figure S2. Global distributions of rs10489202 in 53 world populations**

**SNP: rs10489202**

**Protective Allele: G**

**Risk Allele: T**

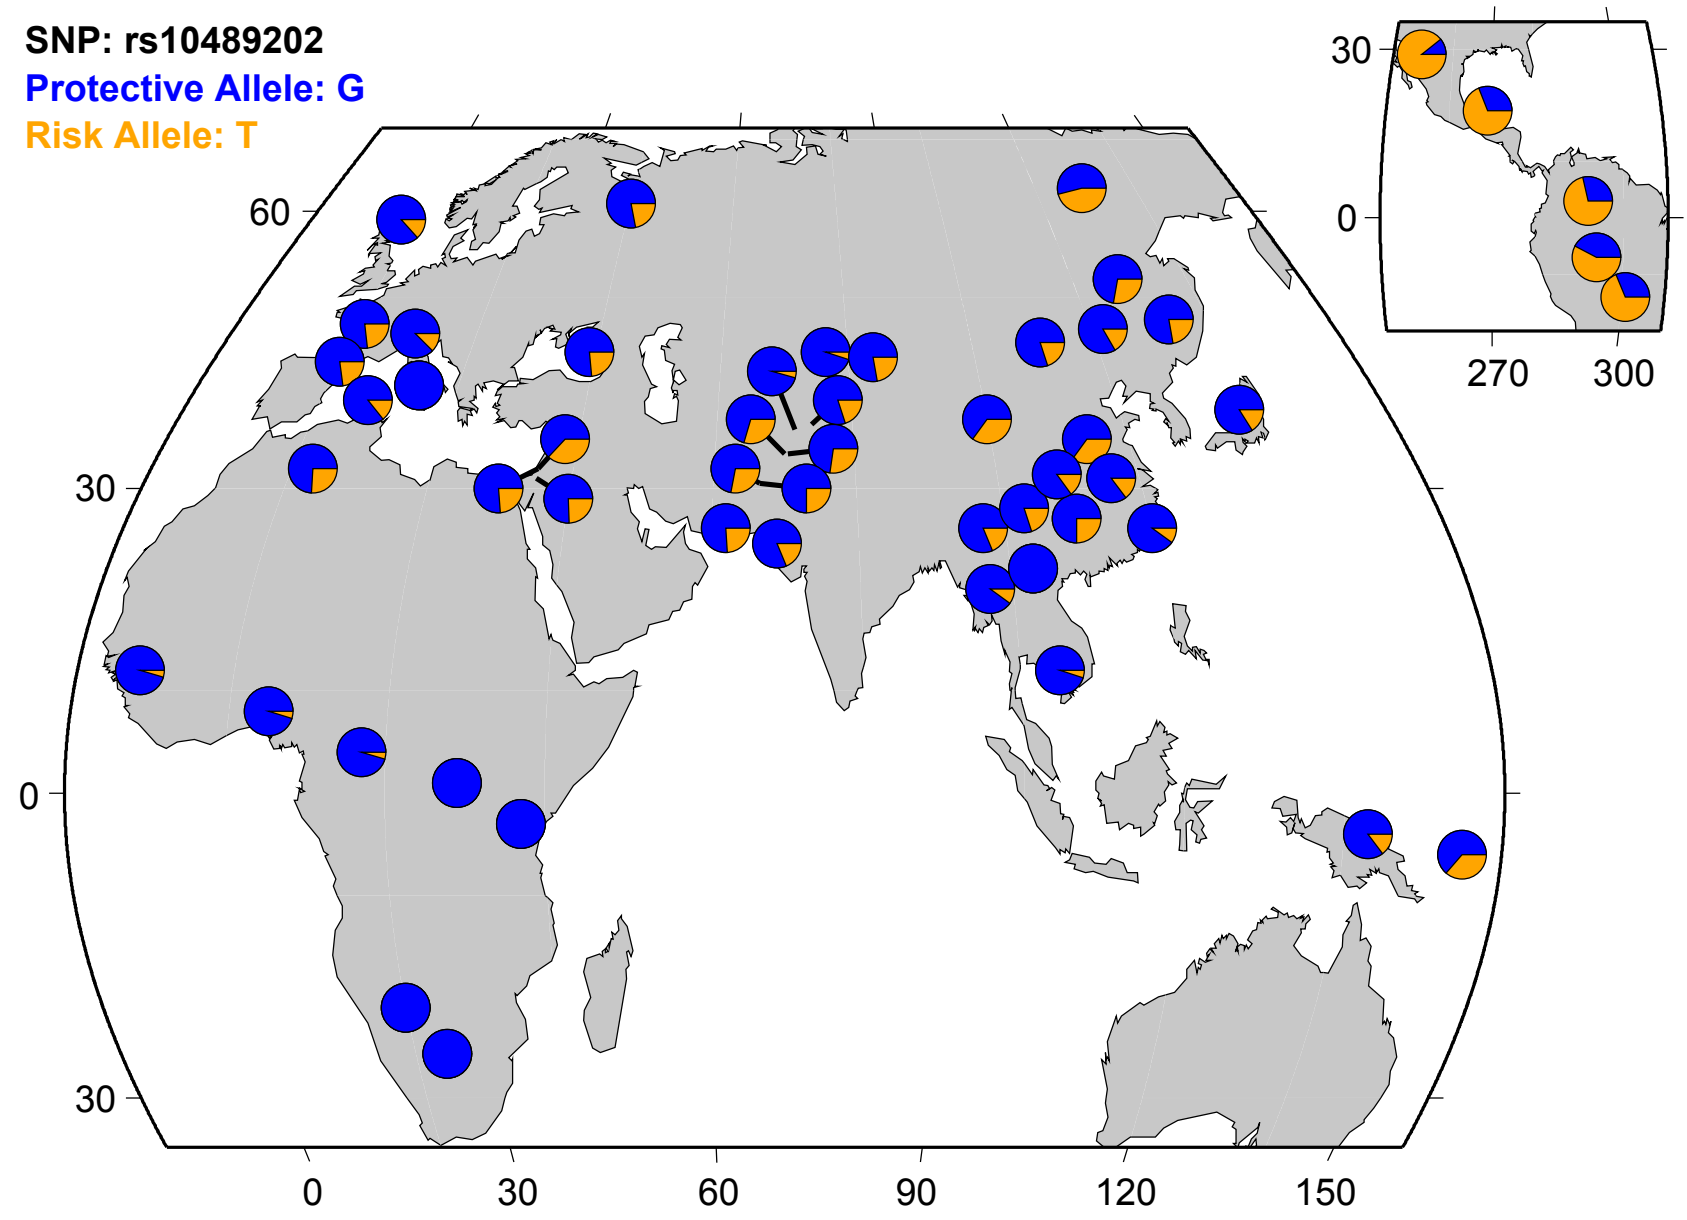

**Figure S3. Comparisons of LD patterns of the genomic regions covering rs10489202 between East Asians and Europeans**

rs10489202

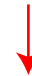

**East Asians**

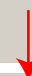

**Europeans**

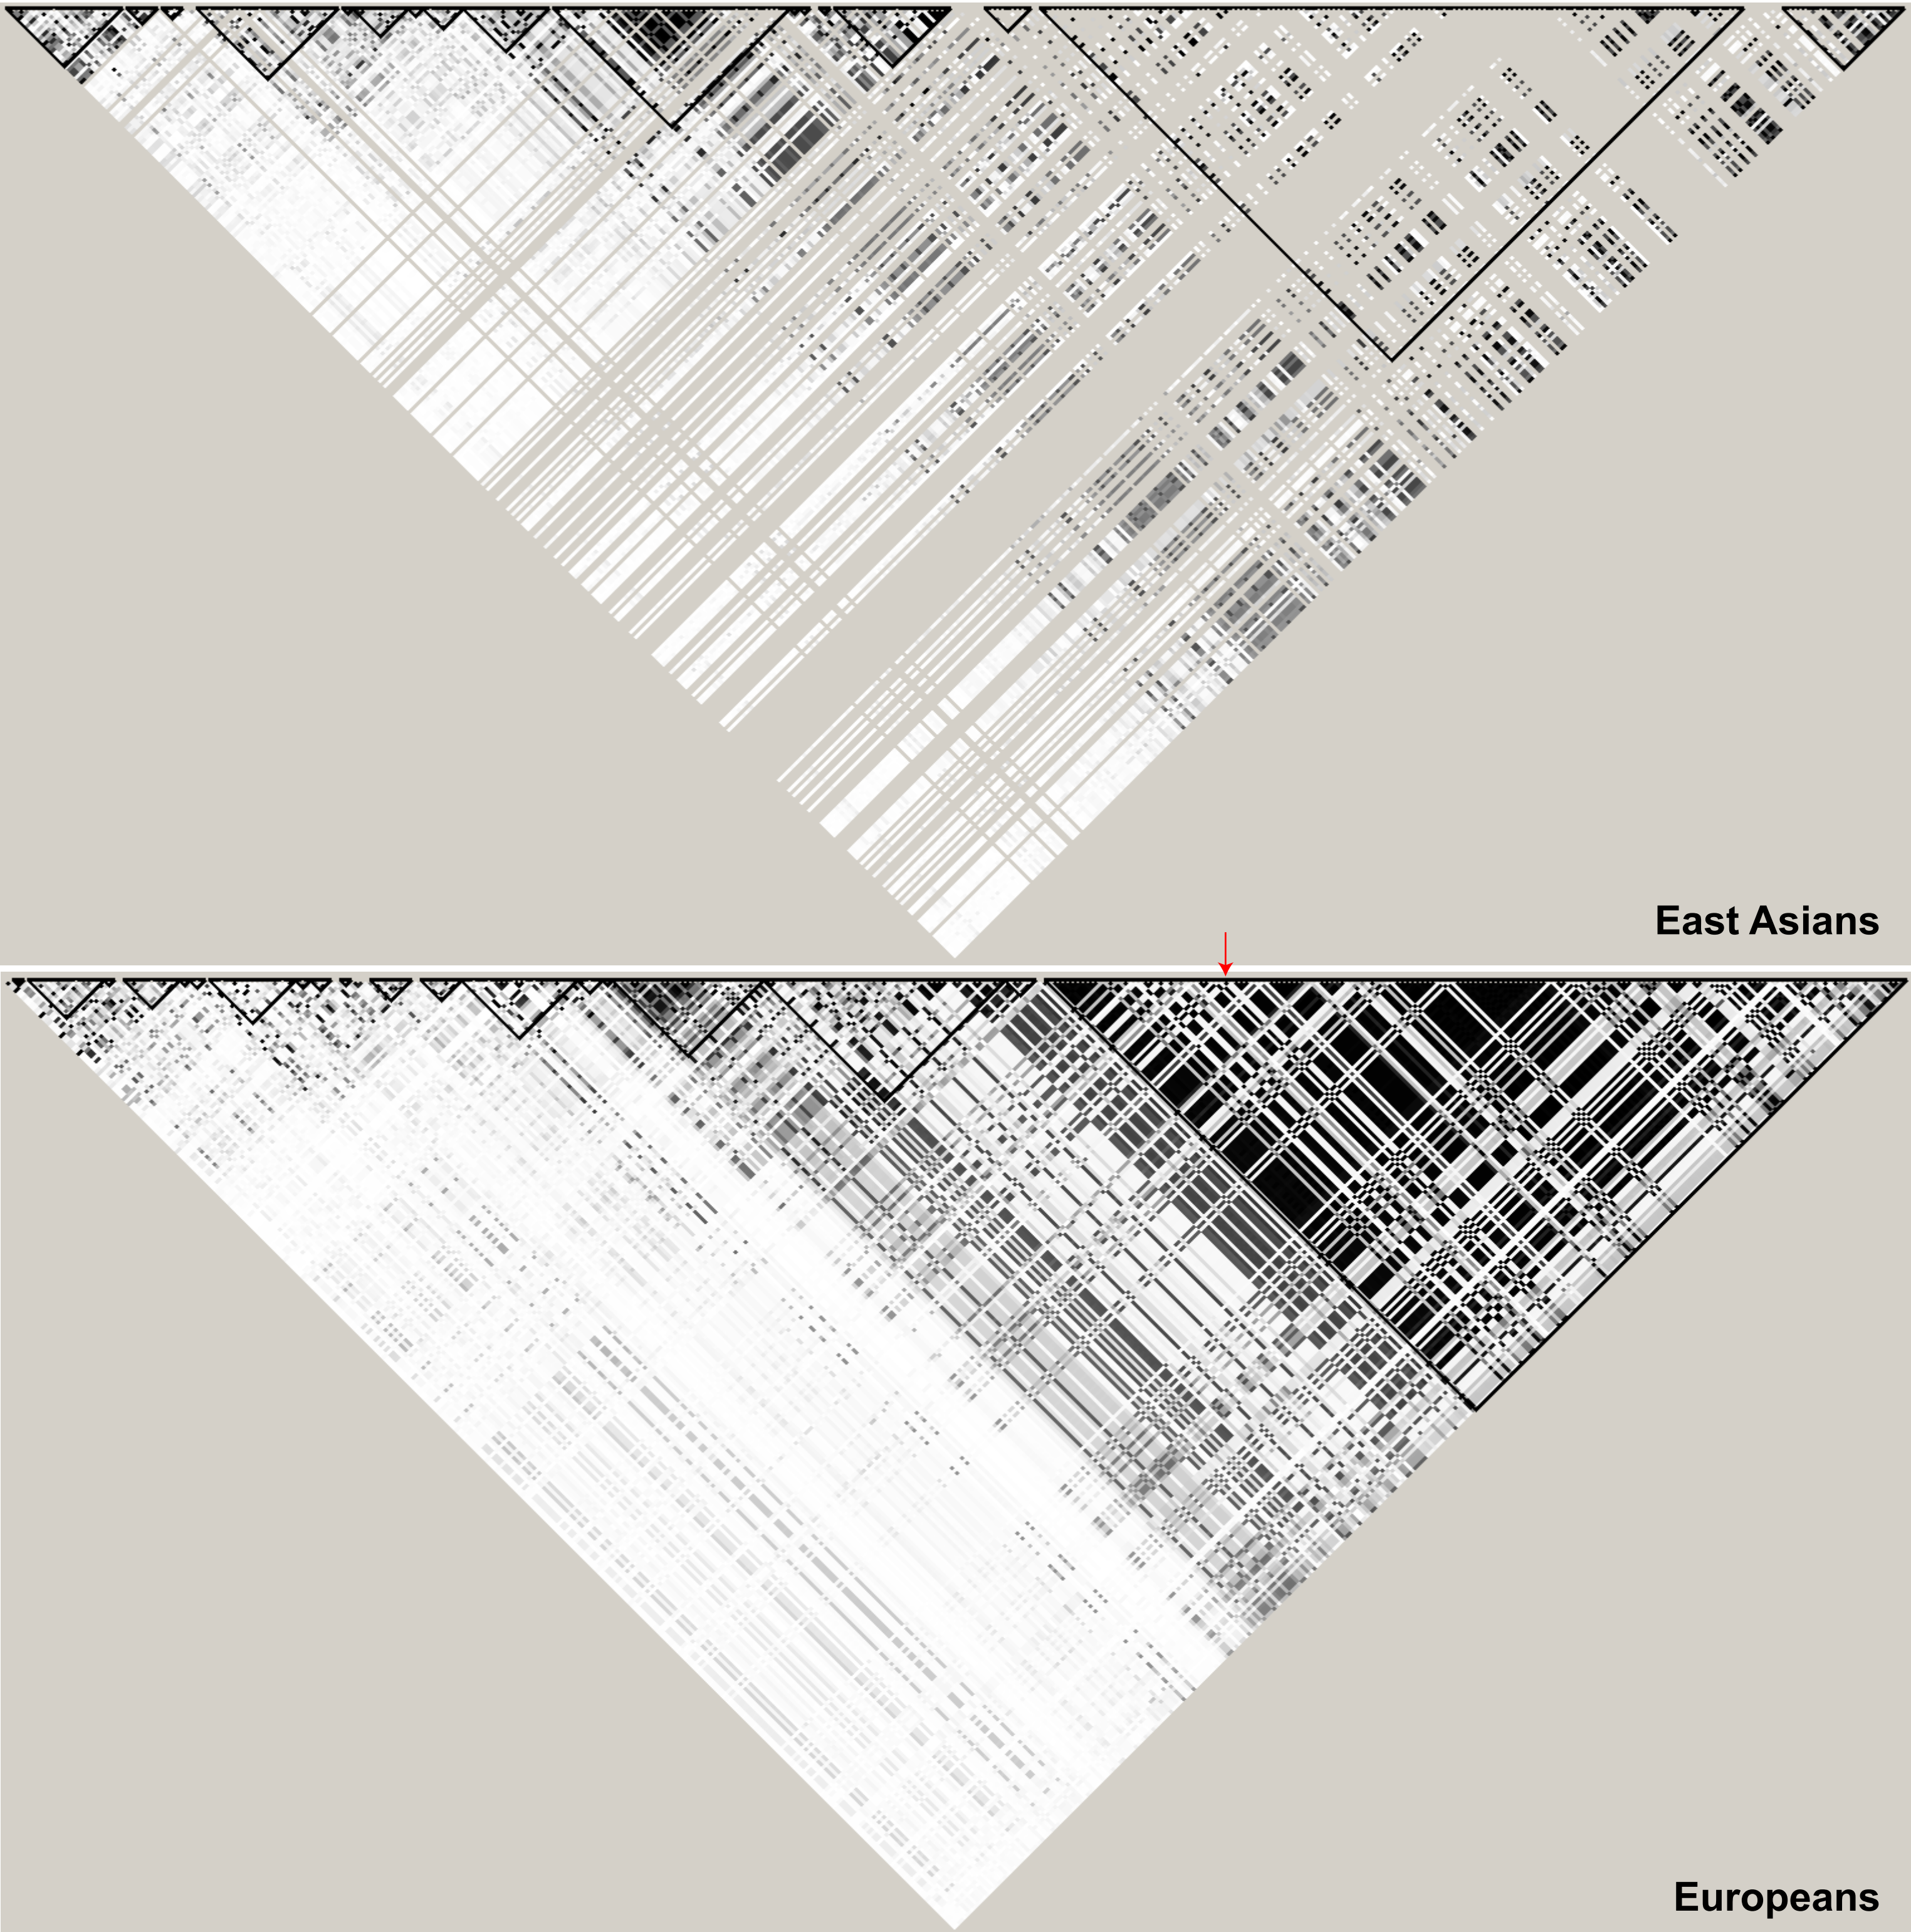

**Figure S4. Comparisons of rs10489202 LD SNPs between East Asian and European populations**

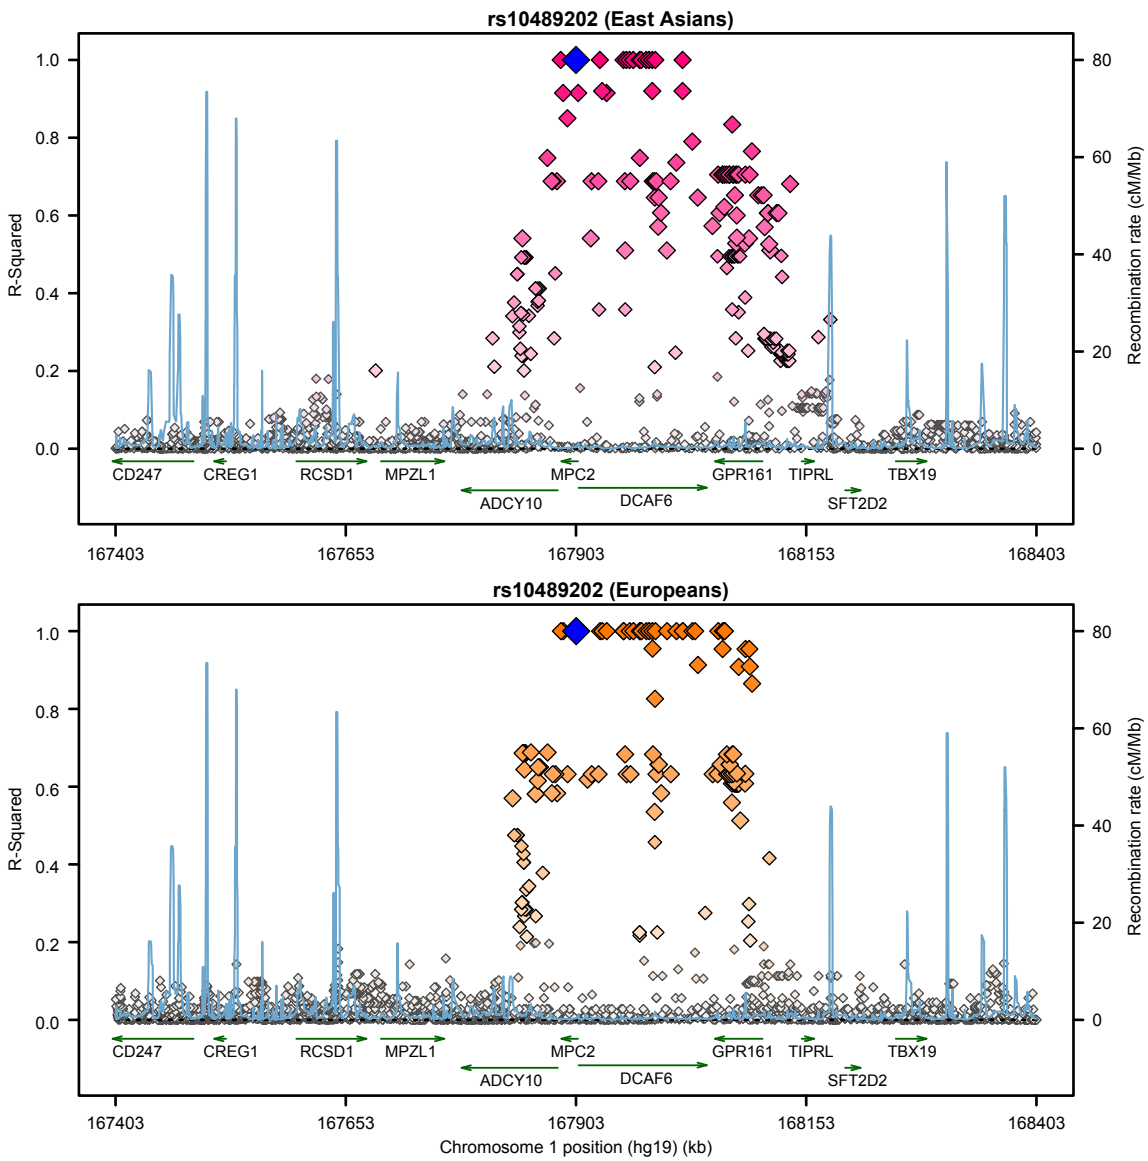

**Figure S5. Association results of the SNPs in 1q24.2 with schizophrenia in European populations from PGC2 GWAS**

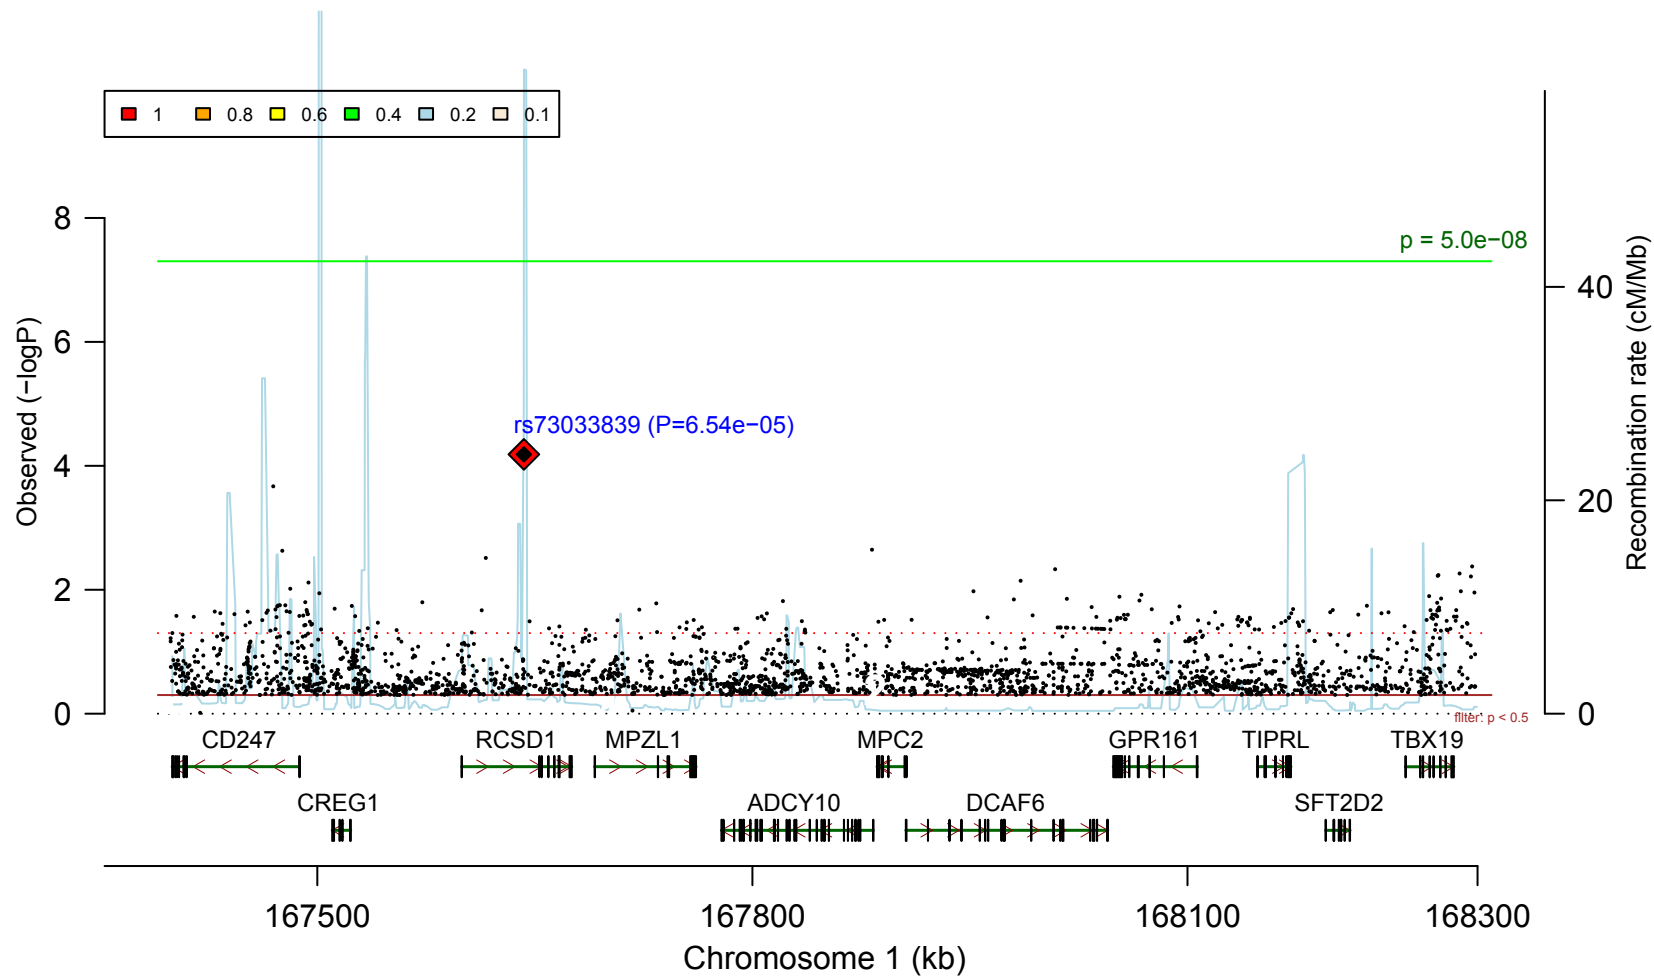

**Figure S6. Plot of chromosome region showing a genomic area of LD with rs10489202 in East Asian populations**

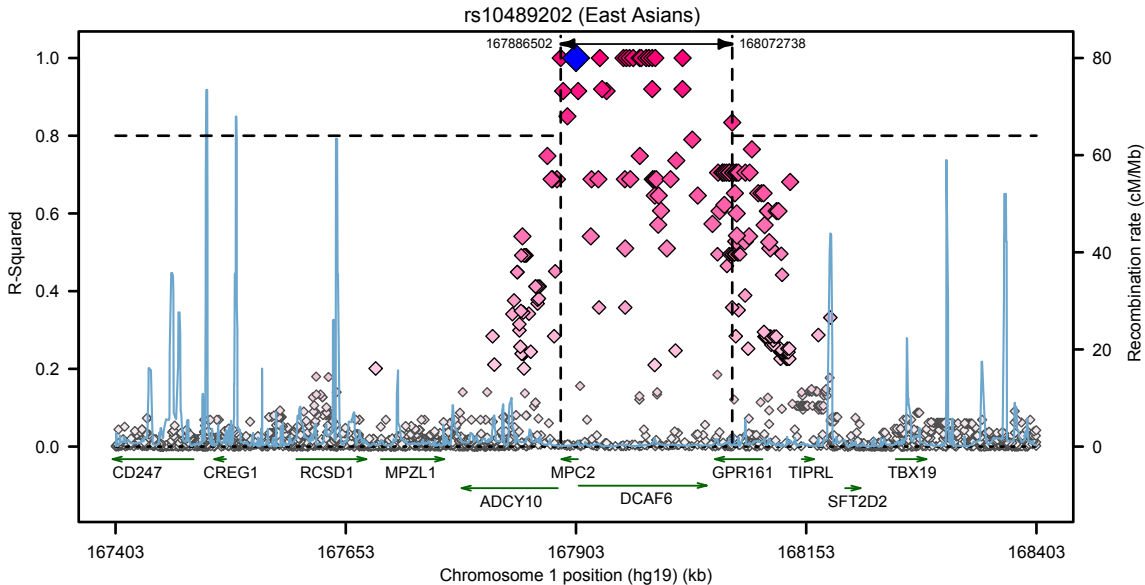

Supplement: Supplementary file 2 — Supplementary Figures [file 41398_2018_211_MOESM2_ESM.pdf]
